# Supplementary material
Source: PubMed Central journal article supplement (PMC4666006)
Supplement: NIHMS739119-supplement-Supplemental_Data_1.pdf [file NIHMS739119-supplement-Supplemental_Data_1.pdf]

## Supplementary Data

**Table S1. Inclusion and Exclusion Criteria**

---

|                           |                                                                                                                                                                                                                                                                                                                                                                                                                                                                                                                                                                                                                                                                                                                                                                                                                    |
|---------------------------|--------------------------------------------------------------------------------------------------------------------------------------------------------------------------------------------------------------------------------------------------------------------------------------------------------------------------------------------------------------------------------------------------------------------------------------------------------------------------------------------------------------------------------------------------------------------------------------------------------------------------------------------------------------------------------------------------------------------------------------------------------------------------------------------------------------------|
| <b>Inclusion criteria</b> | <ul style="list-style-type: none"><li>• Aged <math>\geq 18</math> years</li><li>• Histologically confirmed RCC with a clear cell component</li><li>• Documented PD</li><li>• Measurable disease by RECIST criteria</li><li>• <math>\leq 1</math> prior VEGFR-targeted therapy; no prior treatment with mTOR-targeted drugs</li><li>• Karnofsky performance status <math>&gt;70\%</math>, life expectancy <math>\geq 3</math> months</li><li>• Ability to give written informed consent</li></ul>                                                                                                                                                                                                                                                                                                                   |
| <b>Exclusion criteria</b> | <ul style="list-style-type: none"><li>• Known hypersensitivity to temsirolimus or its metabolites (including sirolimus), polysorbate 80, or any other component of the temsirolimus formulation</li><li>• Primary CNS malignancies or active CNS metastases</li><li>• Hematologic malignancies (ie, leukemia, lymphoma, and multiple myeloma)</li><li>• Hematologic abnormalities (hemoglobin <math>&lt;9.0</math> g/dL; ANC <math>&lt;1500/\text{mm}^3</math>; platelets <math>&lt;100,000/\text{mm}^3</math>)</li><li>• Serum chemistry abnormalities (fasting serum cholesterol <math>&gt;350</math> mg/dL; fasting triglycerides <math>&gt;400</math> mg/dL; total bilirubin <math>&gt;1.5 \times \text{ULN}</math>; AST or ALT <math>&gt;2.5 \times \text{ULN}</math> (or <math>&gt;5 \times</math></li></ul> |

---

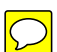

ULN in patients with liver metastasis); serum albumin <3.0 g/dL; creatinine >1.5 × ULN [or calculated creatinine clearance <50 mL/m/1.73 m<sup>2</sup>]; proteinuria >2.5 g/24-h or 3+ with urine dipstick)

- Significant cardiovascular disease (ie, active clinically symptomatic left ventricular failure, active hypertension [diastolic blood pressure >100 mmHg; patients with a history of hypertension must have been stable on antihypertensive drugs for ≥4 weeks], uncontrolled hypertension [blood pressure >140/90 mmHg on ≥2 antihypertensive medications], and myocardial infarction ≤3 months prior to first dose of study drug)
- Patients with delayed healing of wounds, ulcers, and/or bone fractures
- Pulmonary hypertension or pneumonitis
- Serious/active infection; infection requiring parenteral antibiotics
- Inadequate recovery from any prior surgical procedure; major surgical procedure within 6 weeks prior to study entry
- Uncontrolled psychiatric disorder, altered mental status precluding informed consent or necessary testing
- Inability to comply with protocol requirements

- Ongoing hemoptysis or history of clinically significant bleeding
- Cerebrovascular accident  $\leq 12$  months of study entry, or peripheral vascular disease with claudication on walking  $< 1$  block
- Deep venous thrombosis or pulmonary embolus  $\leq 6$  months of study entry and/or ongoing need for full-dose oral or parenteral anticoagulation
- Patients with a “currently active” second primary malignancy other than non-melanoma skin cancers. Patients are not considered to have a “currently active” malignancy if they have completed anticancer therapy and are considered by their physician to be  $< 30\%$  risk of relapse
- Pregnant or lactating women; all male and female fertile patients must use adequate contraception (barrier method) while on study and for 3 months thereafter
- Known concomitant genetic or acquired immune suppression disease, such as HIV

---

RCC, renal cell carcinoma; PD, progressive disease; RECIST, Response Evaluation Criteria In Solid Tumors; VEGFR, vascular endothelial growth factor receptor; mTOR, mammalian target of rapamycin; CNS, central nervous system; ANC, absolute neutrophil count; ULN, upper limit of normal; AST, aspartate aminotransferase; ALT, alanine aminotransferase.

**Table S2. DLT Criteria**

---

Definition of the MTD

- The maximum dose at which  $\leq 1$  of 3–6 patients in a dose group experience a drug-related DLT during treatment cycle 1
- The MTD will not be established until all patients entered into the dose level under evaluation have completed cycle 1 (or have discontinued further participation in the study due to the occurrence of a DLT)

---

The occurrence of any of the following drug-related toxicities were considered to be

DLTs

1. Grade 3 nonhematologic toxicity lasting  $>3$  days despite optimal supportive care with the exception of
    - Alopecia
    - Grade 3 rash, if tolerated by the subject
    - Grade 3 manageable hypertension
    - Grade 3 self-limited or medically controllable toxicities (eg, fever without neutropenia, nausea, vomiting, fatigue)
    - Grade 3 AST or ALT lasting for  $\geq 1$  week
  2. Grade 4 nonhematologic toxicity
  3. Neutropenia that is
    - Grade 3/4 associated with fever (oral temperature  $>39^{\circ}\text{C}$ ) and requiring antibiotic therapy
    - Grade 4 and sustained (duration  $>5$  days)
-

4. Grade 4 thrombocytopenia (ie, platelets  $<25,000/\text{mm}^3$ )
5. Toxicity of any grade that results in interruption of treatment for  $>2$  weeks

---

DLT, dose-limiting toxicity; MTD, maximum tolerated dose; AST, aspartate aminotransferase; ALT, alanine aminotransferase.
